# Supplementary material for: Severe malnutrition or famine exposure in childhood and cardiometabolic non-communicable disease later in life: a systematic review
Source: PubMed Central journal article supplement (PMC7949429; doi:10.1136/bmjgh-2020-003161), 2021-03-10
Supplement: bmjgh-2020-003161supp003.pdf [file bmjgh-2020-003161supp003.pdf]

Table 1. Studies examining effects of early life famine exposure on NCD outcomes by study design

| Study                                    | Country and population     | Exposure age group in years (sample size)                      | Outcome(s)                                              | Key findings*                                              | Risk of bias score (IV/EV)† |
|------------------------------------------|----------------------------|----------------------------------------------------------------|---------------------------------------------------------|------------------------------------------------------------|-----------------------------|
| <b>Retrospective cohort studies</b>      |                            |                                                                |                                                         |                                                            |                             |
| Chen <i>et al</i> 2019 <sup>31</sup>     | China, adults > 40y        | 0–9y (n=1799)<br>10–37y (n=1064)                               | Visceral adipose dysfunction (VAD)                      | ↑ VAD (women 0–9y)                                         | ● / ●                       |
| Finer <i>et al</i> 2016 <sup>21</sup>    | Bangladesh, adults ~30y    | 1–2y (n=81)                                                    | Glucose tolerance, epigenetics                          | ↔ Glucose tolerance<br>↓ Epigenetics                       | ● / ●                       |
| Head <i>et al</i> 2008 <sup>22</sup>     | England, adults ~70y       | 8–22y (n=225)                                                  | Cardiovascular disease (CVD)                            | ↑ CVD                                                      | - / -                       |
| Head <i>et al</i> 2009 <sup>32</sup>     | England, adults ~70y       | 8–22y (n=87)                                                   | Cholesterol levels                                      | ↔ Cholesterol levels                                       | - / -                       |
| Huang <i>et al</i> 2010 <sup>33</sup>    | China, women ~50y          | 0–1.5y (n=1035)<br>1.5–2.5y (n=743)                            | Hypertension, body mass index (BMI)                     | ↑ Hypertension (0–1.5y)<br>↑ BMI (1.5–2.5y)                | ● / ●                       |
| Idris <i>et al</i> 2013 <sup>29</sup>    | Netherlands, women ~70y    | 0–9y (n=93)<br>10–18y (n=54)                                   | Coronary artery calcifications, valve calcification     | ↑ Coronary calcium score (10–18y)<br>↔ Valve calcification | ● / -                       |
| Li, Y <i>et al</i> 2010 <sup>34</sup>    | China, adults ~45y         | 0–2y (n=1654)<br>3–5y (n=1588)<br>6–8y (n=1673)                | Hyperglycemia, type 2 diabetes (T2D)                    | ↑ Fasting plasma glucose<br>↑ Hyperglycemia (6–8y)         | ● / ●                       |
| Li, Y <i>et al</i> 2011 <sup>35</sup>    | China, adults ~45y         | 0–2y (n=1654)<br>3–5y (n=1588)<br>6–8y (n=1673)                | Metabolic syndrome (MetS)                               | ↑ MetS (0–2y)                                              | ● / ●                       |
| Liu, L <i>et al</i> 2017 <sup>19</sup>   | China, adults 35–74y       | 0–9y (n=n/r)<br>10–17y (n=n/r)                                 | Obesity                                                 | ↑ Obesity                                                  | - / ●                       |
| Liu, L <i>et al</i> 2017 <sup>36</sup>   | China, adults 45–53y       | 0–3y (n=455)                                                   | Hypertension                                            | ↔ Hypertension                                             | - / -                       |
| Portrait <i>et al</i> 2011 <sup>37</sup> | Netherlands, adults 60–76y | 0–1y (n=81)<br>1–5y (n=293)<br>6–10y (n=244)<br>11–14y (n=181) | Heart diseases, peripheral arterial diseases (PAD), T2D | ↑ T2D, PAD (women, 11–14y)                                 | ● / ●                       |
| Rotar <i>et al</i> 2017 <sup>38</sup>    | Russia, adults 64–81y      | 0–1y (n=50)<br>1–10y (n=210)                                   | Cardiovascular health, telomere length                  | ↔ CVD, organ damage<br>↓ Telomere length                   | ● / -                       |
| Shi <i>et al</i> 2018 <sup>39</sup>      | China, adults ~55y         | 0–2y (n=1149)<br>3–5y (n=1217)<br>6–8y (n=1250)                | CVD                                                     | ↑ CVD (with hypertension and famine exposure)              | ● / ●                       |
| Wang, J <i>et al</i> 2016 <sup>40</sup>  | China, adults ~60y         | 1–3y (n=1932)<br>3–5y (n=1712)<br>5–7y (n=1953)                | T2D, hyperglycemia                                      | ↑ T2D, hyperglycemia (women 3–5y, 5–7y)                    | ● / -                       |
| Wang, N <i>et al</i> 2015 <sup>41</sup>  | China, adults 52–93y       | 0–9y (n=1911)<br>10–37y (n=1188)                               | T2D                                                     | ↑ T2D (women, 0–9y)                                        | ● / ●●                      |
| Wang, N <i>et al</i> 2016 <sup>42</sup>  | China, adults 52–93y       | 0–9y (n=1778)<br>10–37y (n=1076)                               | Non-alcoholic fatty liver disease (NAFLD)               | ↑ NAFLD (women, 0–9y)                                      | ● / ●●                      |
| Wang, N <i>et al</i> 2017 <sup>43</sup>  | China, adults 52–77y       | 0–9y (n=1140)<br>10–33y (n=706)                                | T2D                                                     | ↑ T2D (0–9y)                                               | ● / ●●                      |
| Wang, N <i>et al</i> 2017 <sup>44</sup>  | China, adults 52–93y       | 0–9y (n=1776)<br>10–37y (n=1053)                               | MetS                                                    | ↑ MetS (women, 0–9y)                                       | ● / ●●                      |
| Wang, N <i>et al</i> 2018 <sup>45</sup>  | China, women 52–93y        | 0–9y (n=1679)<br>10–37y (n=1003)                               | Chronic kidney disease (CKD)                            | ↔ CKD                                                      | ● / ●●                      |
| Wang, P <i>et al</i> 2012 <sup>46</sup>  | China, adults ~50y         | 0–2y (n=3126)                                                  | Hypertension, obesity                                   | ↑ Hypertension<br>↔ Obesity                                | ● / ●●                      |
| Wang, Y <i>et al</i> 2010 <sup>46</sup>  | China, adults ~50y         | 1–3y (n=4,563)                                                 | Overweight, obesity                                     | ↑ Weight/BMI (women)<br>↑ Obesity (women)                  | - / -                       |
| Wang, Z <i>et al</i> 2016 <sup>47</sup>  | China, adults ~50y         | 0–1y (n=338)<br>2–6y (n=457)                                   | Hypertension                                            | ↑ Hypertension (0–1y)                                      | ● / ●                       |
| Wang, Z <i>et al</i> 2017 <sup>48</sup>  | China, adults ~50y         | 0–1y (n=536)<br>2–6y (n=597)                                   | Dyslipidemia                                            | ↑ Low-density lipoprotein cholesterol (women)              | - / ●                       |

|                                             |                           |                                                                |                                      |                                                                                                                                 |        |
|---------------------------------------------|---------------------------|----------------------------------------------------------------|--------------------------------------|---------------------------------------------------------------------------------------------------------------------------------|--------|
| Wang, Z <i>et al</i> 2019 <sup>49</sup>     | China, adults ~50y        | 0–1y (n=269)<br>2–6y (n=717)                                   | MetS                                 | ↑ MetS (0–1y)                                                                                                                   | - / ●  |
| Xin 2019 <sup>50</sup><br><i>et al</i>      | China, adults, ~60y       | 3–12y (n=2132)<br>13–20y (n=1140)                              | Dyslipidemia                         | ↑ Dyslipidemia                                                                                                                  | - / -  |
| Yao <i>et al</i> 2019 <sup>51</sup>         | China, adults, ~60y       | 2–4y (n=206)                                                   | Dyslipidemia                         | ↔ Dyslipidemia                                                                                                                  | - / -  |
| Yu, C <i>et al</i> 2017 <sup>52</sup>       | China, adults ~60y        | 0–3y (n=2115)<br>3–5y (n=1941)<br>5–7y (n= 2248)               | Hypertension                         | ↑ Hypertension                                                                                                                  | ● / -  |
| Yu, C <i>et al</i> 2018 <sup>53</sup>       | China, adults ~60y        | 0–3y (n=1940)<br>3–5y (n=1741)<br>5–7y (n=2010)                | MetS                                 | ↑ MetS (women)                                                                                                                  | ● / -  |
| Zheng, X <i>et al</i> 2011 <sup>54</sup>    | China, adults ~55y        | 0–2y (n=1344)                                                  | MetS                                 | ↑ MetS (women)                                                                                                                  | ● / -  |
| Zheng, X <i>et al</i> 2017 <sup>55</sup>    | China, women ~55y         | 0–2y (n=2403)                                                  | NAFLD                                | ↑ NAFLD                                                                                                                         | ● / -  |
| Zheng, X <i>et al</i> 2019 <sup>56</sup>    | China, adults ~55y        | 0–2y (n=95)                                                    | Thyroid function                     | ↓ Free thyroxine<br>↑ Thyroid stimulating hormone                                                                               | - / -  |
| <b>Prospective cohort studies</b>           |                           |                                                                |                                      |                                                                                                                                 |        |
| Hult <i>et al</i> 2010 <sup>17</sup>        | Nigeria, adults ~40y      | 0–3y (n=246)                                                   | Hypertension, glucose tolerance, BMI | ↑ Blood pressure<br>↔ Glucose tolerance, BMI                                                                                    | ● / -  |
| Meng <i>et al</i> 2018 <sup>57</sup>        | China, adults ~45y        | 1–3y (n=31,363)                                                | T2D, obesity                         | ↔ T2D, obesity<br>↓ Abdominal obesity                                                                                           | ● / ●  |
| Sparen <i>et al</i> 2014 <sup>58</sup>      | Russia, men 64–83y        | 6–8y, 9–15y, 16–26y (total n=1406)                             | CVD risk factors and mortality       | ↑ Blood pressure (9–15y)<br>↑ Ischaemic heart disease mortality, stroke (9–15y)                                                 | ●● / ● |
| Sun <i>et al</i> 2018 <sup>59</sup>         | China, adults ~55y        | 1–3y (n=1297)<br>4–6y (n=1476)<br>7–10y (n=1499)               | Hyperglycemia, T2D                   | ↑ Hyperglycemia (women)<br>↓ T2D (men 1–3y, 7–10y)                                                                              | - / -  |
| Vaiserman <i>et al</i> 2013 <sup>18</sup>   | Ukraine, adults ~70y      | 0–3y (n=n/r)                                                   | T2D                                  | ↔ T2D                                                                                                                           | ● / ●  |
| van Abeelen <i>et al</i> 2012 <sup>27</sup> | Netherlands, women 49–70y | 0–9y (n=n/r)<br>10–17y (n=n/r)                                 | T2D                                  | ↑ T2D (0–9y)                                                                                                                    | ● / ●  |
| van Abeelen <i>et al</i> 2012 <sup>28</sup> | Netherlands, women 49–70y | 0–9y (n=2196)<br>10–17y (n=1773)                               | Coronary heart disease (CHD), stroke | ↑ CHD (10–17y)<br>↓ Stroke                                                                                                      | ● / ●  |
| <b>Cross-sectional studies</b>              |                           |                                                                |                                      |                                                                                                                                 |        |
| Khalangot <i>et al</i> 2017 <sup>26</sup>   | Ukraine, adults > 44y     | Age in childhood n/s (n=62)                                    | Glucose tolerance                    | ↓ T2D                                                                                                                           | ● / ●  |
| Koupil <i>et al</i> 2007 <sup>60</sup>      | Russia, adults 40–70y     | 1–5y (n=81)<br>6–8y (n=287)<br>9–15y (n=739)<br>16–25y (n=813) | CVD risk factors and mortality       | ↑ Hypertension (men 6–25y)<br>↑ Ischaemic heart disease mortality (men 6–8y)<br>↑ Cerebrovascular disease mortality (men 9–15y) | ● / ●  |
| Woo <i>et al</i> 2010 <sup>30</sup>         | China, adults > 65y       | Age in childhood n/s (n=2222)                                  | NCDs, blood pressure, BMI            | ↑ BMI, myocardial infarction<br>↔ T2D, hypertension                                                                             | ● / -  |
| Zhang <i>et al</i> 2018 <sup>61</sup>       | China, adults ~55y        | 0–3y (n=1582)                                                  | Hyperglycemia, T2D                   | ↑ Hyperglycemia (women)                                                                                                         | ● / ●  |
| Zhou <i>et al</i> 2019 <sup>62</sup>        | China, adults 45–60y      | 0–2y (n=160)<br>3–5y (n=173)<br>6–8y (n=141)                   | NCDs                                 | ↑ T2D (0–2y, 3–5y)<br>↑ Hypercholesterolaemia (0–2y)                                                                            | - / -  |

\* Symbols for effect direction: ↑ increased; ↓ decreased; ↕ mixed (indicate statistically significant results were reported, defined as p < 0.05); ↔ none (indicates no statistically significant result was reported). If no age group is indicated beside the finding, then all age groups were affected.

† The scoring system used in the risk of bias assessment is described in the methods section.

Abbreviations: Body mass index (BMI), cardiovascular disease (CVD), chronic kidney disease (CKD), coronary heart disease (CHD), metabolic syndrome (MetS), non-alcoholic fatty liver disease (NAFLD), n/r (not reported), n/s (not specified), peripheral arterial diseases (PAD), type 2 diabetes (T2D), visceral adipose dysfunction (VAD)
